# Supplementary figures and images for: Retrospective evaluation of ceruminous gland tumors confined to the external ear canal of dogs and cats treated with biopsy and CO2 laser ablation
Source: PubMed Central journal article supplement — J Vet Intern Med. 2023 Sep 20;37(6):2385–90. doi: 10.1111/jvim.16873 (PMC10658490; doi:10.1111/jvim.16873), 2023-09-20

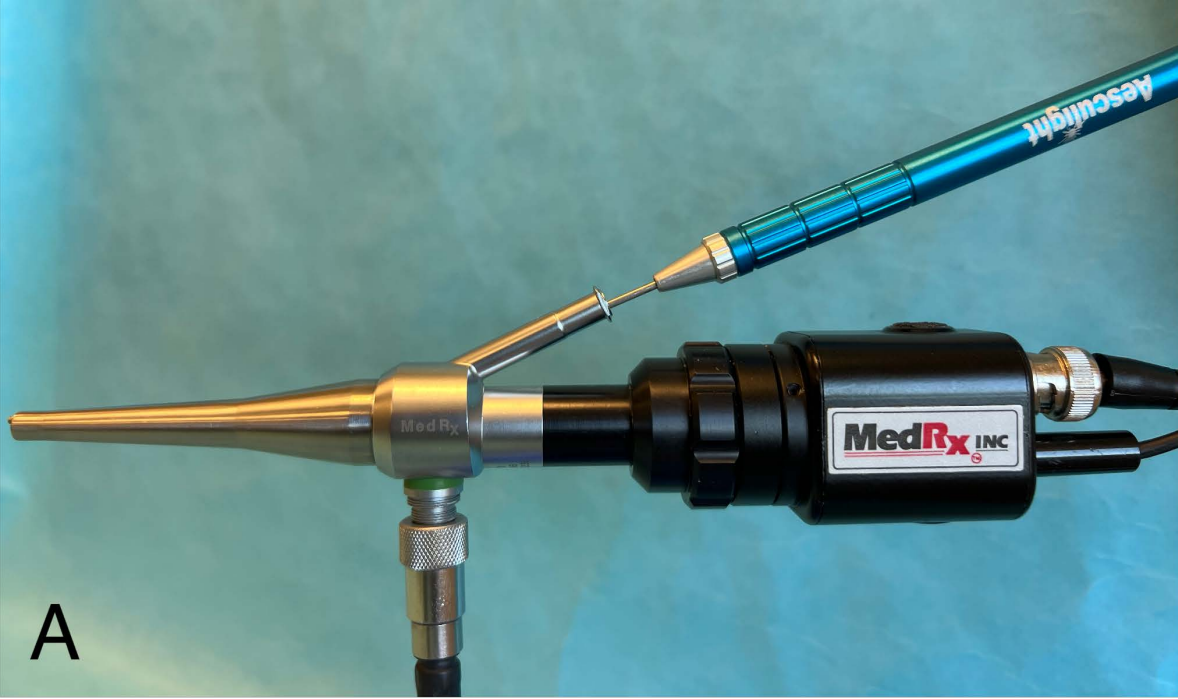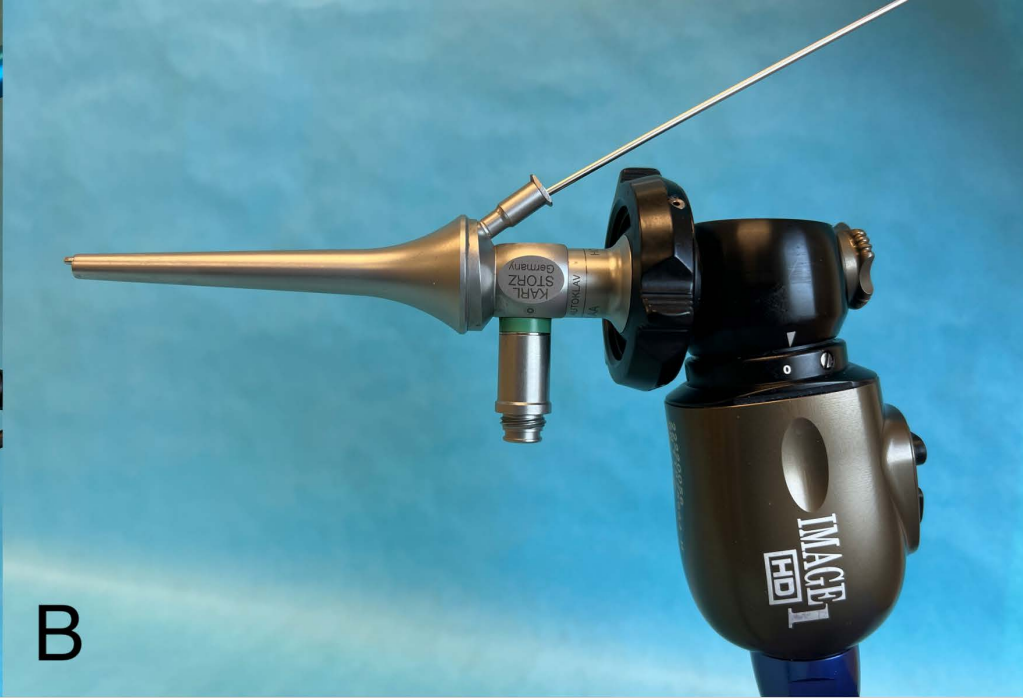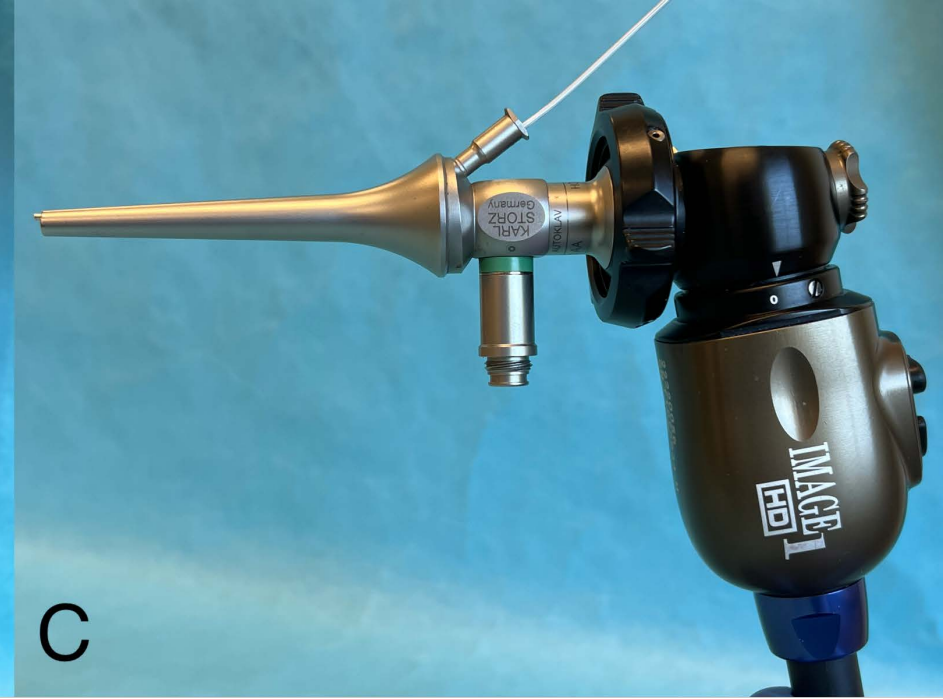

Supplement: JVIM-37-2385-s001.pdf [file JVIM-37-2385-s001.pdf]
